# Supplementary material for: National religiosity eases the psychological burden of poverty
Source: PubMed Central journal article supplement (PMC8488579; doi:10.1073/pnas.2103913118), 2021-09-20
Supplement: pnas.2103913118.sapp.pdf [file pnas.2103913118.sapp.pdf]

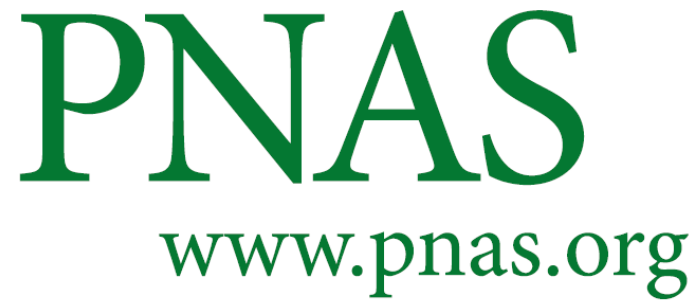

## Supplementary Information for

### National religiosity eases the psychological burden of poverty

**Authors:** Jana B. Berkessel<sup>1†</sup>, Jochen E. Gebauer<sup>1,2</sup>, Mohsen Joshanloo<sup>3</sup>, Wiebke Bleidorn<sup>4</sup>, Peter J. Rentfrow<sup>5</sup>, Jeff Potter<sup>6</sup>, Samuel D. Gosling<sup>7,8</sup>

#### Affiliations:

<sup>1</sup>University of Mannheim.

<sup>2</sup>University of Copenhagen.

<sup>3</sup>Keimyung University.

<sup>4</sup>University of Zurich.

<sup>5</sup>University of Cambridge.

<sup>6</sup>Atof Inc.

<sup>7</sup>University of Texas at Austin.

<sup>8</sup>University of Melbourne.

#### This PDF file includes:

Tables S1 to S5

Figure S1

SI References





| Country     | GWP    |       |       |       |      |      |       | IPP    |        |       |       |       |      |       | WVS   |       |        |       |       |      |       |
|-------------|--------|-------|-------|-------|------|------|-------|--------|--------|-------|-------|-------|------|-------|-------|-------|--------|-------|-------|------|-------|
|             | N      | Age   |       | %     | Nat. | GDP  | Corr. | N      | Age    |       | %     | Nat.  | GDP  | Corr. | N     | Age   |        | %     | Nat.  | GDP  | Corr. |
|             |        | M     | SD    | Women | Rel. |      |       |        | SES-WB | M     | SD    | Women |      |       |       | Rel.  | SES-WB | M     | SD    |      |       |
| Georgia     | 10,664 | 47.51 | 18.26 | 56.30 | 0.81 | 3.91 | 0.46  |        |        |       |       |       |      |       | 4,612 | 43.24 | 17.14  | 54.14 | 0.18  | 3.72 | 0.27  |
| Germany     | 26,515 | 51.57 | 18.16 | 53.72 | 0.39 | 4.63 | 0.44  | 93,222 | 33.67  | 11.68 | 56.87 | 2.01  | 4.60 | 0.18  | 5,722 | 48.13 | 17.33  | 53.36 | -0.75 | 4.54 | 0.27  |
| Ghana       | 10,175 | 34.62 | 14.68 | 49.02 | 0.94 | 3.55 | 0.27  |        |        |       |       |       |      |       | 3,074 | 32.39 | 13.47  | 49.64 | 0.62  | 3.49 | 0.20  |
| Greece      | 9,850  | 49.60 | 18.60 | 55.44 | 0.71 | 4.44 | 0.42  | 1,703  | 29.95  | 9.21  | 63.53 | 2.23  | 4.43 | 0.16  |       |       |        |       |       |      |       |
| Guatemala   | 9,944  | 36.40 | 16.73 | 54.28 | 0.88 | 3.85 | 0.26  | 2,588  | 28.19  | 8.42  | 61.24 | 2.95  | 3.82 | 0.13  |       |       |        |       |       |      |       |
| Guinea      | 6,495  | 37.05 | 16.73 | 46.57 | 0.96 | 3.27 | 0.27  |        |        |       |       |       |      |       |       |       |        |       |       |      |       |
| Guyana      | 471    | 36.49 | 15.27 | 50.53 | 0.87 | 3.70 | 0.18  |        |        |       |       |       |      |       |       |       |        |       |       |      |       |
| Haiti       | 3,974  | 36.87 | 15.75 | 50.96 | 0.81 | 3.22 | 0.13  |        |        |       |       |       |      |       | 1,612 | 33.57 | 14.74  | 51.18 | 0.21  | 3.25 | -0.03 |
| Honduras    | 10,220 | 36.57 | 16.19 | 53.79 | 0.85 | 3.63 | 0.28  | 1,345  | 28.94  | 7.94  | 64.76 | 3.05  | 3.60 | 0.07  |       |       |        |       |       |      |       |
| Hong Kong   | 7,550  | 42.50 | 18.54 | 53.05 | 0.25 | 4.72 | 0.43  | 2,758  | 29.76  | 9.69  | 64.29 | 2.36  | 4.67 | 0.09  | 2,192 | 44.36 | 16.05  | 53.15 | -0.92 | 4.65 | 0.22  |
| Hungary     | 9,770  | 52.54 | 18.05 | 59.45 | 0.40 | 4.38 | 0.43  | 815    | 30.44  | 9.95  | 59.14 | 2.12  | 4.33 | 0.14  | 1,615 | 45.35 | 17.25  | 53.56 | -0.59 | 4.22 | 0.32  |
| Iceland     | 3,516  | 47.51 | 16.88 | 55.97 | 0.35 | 4.68 | 0.44  | 535    | 29.02  | 9.87  | 58.88 | 2.08  | 4.61 | 0.21  |       |       |        |       |       |      |       |
| India       | 45,476 | 36.42 | 14.65 | 45.01 | 0.83 | 3.70 | 0.35  | 13,181 | 27.49  | 7.59  | 41.76 | 3.14  | 3.66 | 0.07  | 9,535 | 39.89 | 14.18  | 43.11 | 0.30  | 3.47 | 0.25  |
| Indonesia   | 13,800 | 38.66 | 14.26 | 56.23 | 0.98 | 3.96 | 0.32  | 1,946  | 27.15  | 7.97  | 55.65 | 3.17  | 3.95 | 0.08  | 2,717 | 39.09 | 14.30  | 48.07 | 0.46  | 3.77 | 0.16  |
| Iran        | 11,187 | 36.48 | 13.58 | 49.36 | 0.82 | 4.25 | 0.38  | 562    | 28.19  | 8.52  | 53.56 | 2.45  | 4.23 | 0.13  | 4,965 | 33.59 | 14.17  | 47.79 | 0.34  | 4.13 | 0.25  |
| Iraq        | 14,346 | 35.16 | 12.35 | 44.91 | 0.85 | 4.15 | 0.25  |        |        |       |       |       |      |       | 6,058 | 36.96 | 13.65  | 50.50 | -0.05 | 4.05 | 0.27  |
| Ireland     | 10,103 | 47.08 | 15.98 | 53.96 | 0.55 | 4.73 | 0.36  | 8,632  | 29.48  | 10.18 | 61.98 | 2.21  | 4.66 | 0.16  |       |       |        |       |       |      |       |
| Israel      | 10,616 | 41.62 | 16.37 | 51.99 | 0.45 | 4.51 | 0.29  | 1,583  | 31.51  | 10.84 | 55.40 | 2.00  | 4.47 | 0.17  |       |       |        |       |       |      |       |
| Italy       | 12,359 | 49.05 | 16.17 | 57.25 | 0.65 | 4.56 | 0.37  | 3,174  | 33.28  | 10.50 | 52.80 | 2.26  | 4.54 | 0.12  | 924   | 45.67 | 15.55  | 49.24 | 0.20  | 4.48 | 0.23  |
| Ivory Coast | 5,769  | 34.20 | 13.38 | 39.28 | 0.90 | 3.52 | 0.26  |        |        |       |       |       |      |       |       |       |        |       |       |      |       |
| Jamaica     | 1,810  | 40.38 | 17.11 | 53.31 | 0.83 | 3.93 | 0.28  | 595    | 29.99  | 9.56  | 76.81 | 3.44  | 3.91 | 0.02  |       |       |        |       |       |      |       |
| Japan       | 14,838 | 53.65 | 16.77 | 53.38 | 0.25 | 4.57 | 0.42  | 2,775  | 29.13  | 9.20  | 51.93 | 2.24  | 4.55 | 0.11  | 5,424 | 47.94 | 15.98  | 52.08 | -0.74 | 4.44 | 0.40  |
| Jordan      | 14,616 | 35.27 | 14.75 | 51.18 | 0.94 | 3.96 | 0.36  |        |        |       |       |       |      |       | 3,579 | 37.78 | 14.89  | 50.63 | 0.33  | 3.90 | 0.23  |
| Kazakhstan  | 9,944  | 41.81 | 16.48 | 58.54 | 0.45 | 4.35 | 0.28  |        |        |       |       |       |      |       | 1,500 | 40.02 | 15.35  | 60.40 | -0.19 | 4.33 | 0.23  |
| Kenya       | 11,875 | 32.41 | 12.51 | 51.15 | 0.94 | 3.42 | 0.24  | 598    | 30.68  | 8.09  | 62.21 | 3.50  | 3.42 | 0.06  |       |       |        |       |       |      |       |
| Kosovo      | 9,655  | 38.81 | 16.23 | 49.30 | 0.81 | 3.94 | 0.32  |        |        |       |       |       |      |       |       |       |        |       |       |      |       |
| Kuwait      | 12,594 | 35.69 | 11.95 | 37.91 | 0.91 | 4.88 | 0.23  | 388    | 28.91  | 9.53  | 58.51 | 3.08  | 4.90 | 0.02  | 1,089 | 36.59 | 11.77  | 34.89 | 0.07  | 4.87 | 0.19  |
| Kyrgyzstan  | 10,458 | 41.43 | 17.12 | 61.91 | 0.70 | 3.49 | 0.29  |        |        |       |       |       |      |       | 2,513 | 38.06 | 14.78  | 52.85 | 0.09  | 3.40 | 0.11  |





| Country              | GWP    |       |       |       |      |      |       | IPP     |       |       |       |      |      |       | WVS   |        |       |       |       |      |       |    |
|----------------------|--------|-------|-------|-------|------|------|-------|---------|-------|-------|-------|------|------|-------|-------|--------|-------|-------|-------|------|-------|----|
|                      | N      | Age   |       | %     | Nat. | GDP  | Corr. | N       | Age   |       | %     | Nat. | GDP  | Corr. | N     | Age    |       | %     | Nat.  | GDP  | Corr. |    |
|                      |        | M     | SD    |       |      |      |       |         | Women | Rel.  |       |      |      |       |       | SES-WB | M     |       |       |      |       | SD |
| Sudan                | 7,378  | 35.55 | 13.91 | 46.04 | 0.91 | 3.56 | 0.23  |         |       |       |       |      |      |       |       |        |       |       |       |      |       |    |
| Suriname             | 434    | 39.23 | 14.65 | 53.69 | 0.79 | 4.19 | 0.31  |         |       |       |       |      |      |       |       |        |       |       |       |      |       |    |
| Sweden               | 11,464 | 50.91 | 17.97 | 53.97 | 0.19 | 4.65 | 0.32  | 7,993   | 30.22 | 11.05 | 57.85 | 1.67 | 4.63 | 0.19  | 2,873 | 46.63  | 17.71 | 50.02 | -0.90 | 4.50 | 0.16  |    |
| Switzerland          | 6,327  | 52.26 | 17.76 | 54.88 | 0.41 | 4.78 | 0.36  | 17,235  | 33.93 | 11.95 | 58.04 | 2.05 | 4.73 | 0.17  | 2,317 | 48.96  | 17.00 | 52.14 | -0.18 | 4.55 | 0.19  |    |
| Tajikistan           | 10,545 | 37.23 | 16.23 | 59.73 | 0.78 | 3.38 | 0.26  |         |       |       |       |      |      |       |       |        |       |       |       |      |       |    |
| Tanzania             | 10,356 | 34.65 | 14.03 | 50.36 | 0.96 | 3.37 | 0.24  |         |       |       |       |      |      | 1,073 | 37.67 | 13.52  | 44.08 | 0.56  | 3.11  | 0.13 |       |    |
| Thailand             | 13,126 | 43.53 | 15.36 | 64.98 | 0.96 | 4.15 | 0.29  | 1,595   | 27.53 | 10.02 | 58.93 | 2.74 | 4.14 | 0.09  | 2,673 | 45.31  | 14.36 | 49.49 | -0.36 | 4.13 | 0.07  |    |
| Togo                 | 5,650  | 34.04 | 14.16 | 45.01 | 0.86 | 3.16 | 0.27  |         |       |       |       |      |      |       |       |        |       |       |       |      |       |    |
| Trinidad and Tobago  | 1,893  | 42.29 | 17.31 | 52.46 | 0.85 | 4.50 | 0.26  | 632     | 30.78 | 9.96  | 72.31 | 3.08 | 4.49 | 0.10  | 1,964 | 44.09  | 17.59 | 54.84 | 0.31  | 4.46 | 0.14  |    |
| Tunisia              | 11,940 | 38.16 | 16.02 | 49.53 | 0.92 | 4.03 | 0.46  |         |       |       |       |      |      | 1,197 | 38.72 | 16.16  | 47.45 | -0.03 | 4.04  | 0.17 |       |    |
| Turkey               | 12,526 | 37.39 | 14.50 | 49.45 | 0.80 | 4.33 | 0.34  | 992     | 29.37 | 8.70  | 57.86 | 2.39 | 4.27 | 0.08  | 7,974 | 36.94  | 13.88 | 49.84 | 0.12  | 4.06 | 0.21  |    |
| Turkmenistan         | 7,579  | 36.81 | 15.32 | 50.30 | 0.73 | 4.15 | 0.09  |         |       |       |       |      |      |       |       |        |       |       |       |      |       |    |
| Uganda               | 10,346 | 32.43 | 13.31 | 48.74 | 0.95 | 3.21 | 0.22  |         |       |       |       |      |      | 847   | 30.35 | 9.26   | 51.59 | 0.51  | 2.94  | 0.12 |       |    |
| Ukraine              | 10,542 | 46.08 | 17.66 | 62.98 | 0.43 | 3.91 | 0.37  |         |       |       |       |      |      | 4,997 | 45.53 | 16.96  | 60.84 | -0.23 | 3.74  | 0.34 |       |    |
| United Arab Emirates | 16,071 | 34.51 | 11.05 | 44.84 | 0.94 | 4.81 | 0.31  | 2,571   | 30.28 | 9.45  | 53.95 | 2.97 | 4.81 | 0.16  |       |        |       |       |       |      |       |    |
| United Kingdom       | 22,175 | 50.61 | 16.67 | 53.45 | 0.30 | 4.58 | 0.39  | 80,779  | 29.42 | 10.79 | 54.54 | 1.90 | 4.56 | 0.14  | 1,081 | 46.07  | 18.78 | 53.75 | -0.55 | 4.44 | 0.15  |    |
| United States        | 12,803 | 52.25 | 18.35 | 50.78 | 0.65 | 4.72 | 0.44  | 745,859 | 30.07 | 11.45 | 62.95 | 2.70 | 4.70 | 0.13  | 7,168 | 45.34  | 17.34 | 52.06 | 0.15  | 4.56 | 0.20  |    |
| Uruguay              | 10,640 | 49.15 | 19.55 | 61.02 | 0.43 | 4.27 | 0.37  | 2,534   | 31.41 | 10.63 | 68.47 | 2.19 | 4.19 | 0.16  | 2,904 | 45.92  | 18.14 | 55.89 | -0.49 | 4.12 | 0.11  |    |
| Uzbekistan           | 9,428  | 39.47 | 16.54 | 62.75 | 0.58 | 3.71 | 0.26  |         |       |       |       |      |      | 1,430 | 39.30 | 14.84  | 61.05 | -0.22 | 3.65  | 0.13 |       |    |
| Venezuela            | 9,373  | 42.79 | 17.30 | 60.55 | 0.78 | 4.24 | 0.36  | 7,302   | 29.12 | 9.66  | 66.90 | 2.93 | 4.21 | 0.10  | 2,355 | 36.48  | 14.42 | 49.60 | 0.18  | 4.05 | 0.15  |    |
| Vietnam              | 11,266 | 42.34 | 15.62 | 54.64 | 0.34 | 3.70 | 0.33  | 469     | 28.13 | 8.80  | 59.91 | 2.48 | 3.67 | 0.06  | 2,445 | 41.45  | 15.76 | 49.37 | -0.96 | 3.46 | 0.11  |    |
| Yemen                | 12,539 | 34.28 | 13.95 | 49.41 | 0.97 | 3.58 | 0.45  |         |       |       |       |      |      | 975   | 35.58 | 13.17  | 50.36 | 0.26  | 3.60  | 0.27 |       |    |
| Zambia               | 9,232  | 32.24 | 13.13 | 52.03 | 0.95 | 3.54 | 0.26  |         |       |       |       |      |      | 1,214 | 29.57 | 11.30  | 47.86 | 0.40  | 3.41  | 0.20 |       |    |
| Zimbabwe             | 10,573 | 34.90 | 15.28 | 54.59 | 0.89 | 3.30 | 0.38  |         |       |       |       |      |      | 2,465 | 34.25 | 13.99  | 52.25 | 0.50  | 3.36  | 0.30 |       |    |

**Table S1.** National descriptive statistics of all datasets. Following previous research with the same datasets (1, 2) we included all regions that met our statistical requirements, even if they were not technically a nation. <sup>a</sup>In line with the documentation of the World Values Survey Bosnia and Bosnia-Herzegovina were treated as two entities, because the data from Bosnia were collected before Bosnia-Herzegovina was founded.

| Variable                       | <i>M</i> | <i>SD</i> | 1                      | 2                      | 3                      | 4                      | 5                      | 6                      | 7                      | 8                     | 9                      | 10                     |
|--------------------------------|----------|-----------|------------------------|------------------------|------------------------|------------------------|------------------------|------------------------|------------------------|-----------------------|------------------------|------------------------|
| 1. National Religiosity - GWP  | 72.04    | 24.92     |                        |                        |                        |                        |                        |                        |                        |                       |                        |                        |
| 2. National Religiosity - IPP  | 2.61     | 0.44      | .75**<br>[.67, .81]    |                        |                        |                        |                        |                        |                        |                       |                        |                        |
| 3. National Religiosity - WVS  | -0.05    | 0.44      | .90**<br>[.85, .93]    | .77**<br>[.68, .84]    |                        |                        |                        |                        |                        |                       |                        |                        |
| 4. Log 10 GDP per capita - GWP | 4.01     | 0.52      | -.61**<br>[-.70, -.50] | -.46**<br>[-.57, -.33] | -.51**<br>[-.64, -.35] |                        |                        |                        |                        |                       |                        |                        |
| 5. Log 10 GDP per capita - IPP | 4.29     | 0.36      | -.47**<br>[-.62, -.29] | -.57**<br>[-.70, -.41] | -.30*<br>[-.50, -.07]  | 1.00**<br>[1.00, 1.00] |                        |                        |                        |                       |                        |                        |
| 6. Log 10 GDP per capita - WVS | 3.96     | 0.45      | -.40**<br>[-.56, -.23] | -.47**<br>[-.61, -.30] | -.42**<br>[-.57, -.24] | .96**<br>[.93, .97]    | .97**<br>[.95, .98]    |                        |                        |                       |                        |                        |
| 7. Individualism               | -0.58    | 0.56      | -.78**<br>[-.83, -.71] | -.62**<br>[-.71, -.51] | -.62**<br>[-.73, -.48] | .66**<br>[.56, .74]    | .56**<br>[.38, .69]    | .49**<br>[.32, .63]    |                        |                       |                        |                        |
| 8. Income Inequality           | 37.64    | 7.99      | .50**<br>[.37, .62]    | .41**<br>[.26, .53]    | .35**<br>[.16, .52]    | -.39**<br>[-.52, -.24] | -.48**<br>[-.63, -.29] | -.19<br>[-.38, .02]    | -.50**<br>[-.61, -.36] |                       |                        |                        |
| 9. Pathogen Prevalence         | 0.05     | 1.92      | .60**<br>[.49, .69]    | .52**<br>[.40, .62]    | .48**<br>[.32, .61]    | -.68**<br>[-.75, -.58] | -.64**<br>[-.75, -.50] | -.49**<br>[-.62, -.32] | -.63**<br>[-.71, -.54] | .54**<br>[.42, .64]   |                        |                        |
| 10. Employment in Agriculture  | 27.12    | 24.99     | .57**<br>[.45, .66]    | .36**<br>[.22, .49]    | .52**<br>[.37, .65]    | -.85**<br>[-.89, -.80] | -.75**<br>[-.83, -.64] | -.77**<br>[-.84, -.67] | -.58**<br>[-.67, -.47] | .31**<br>[.17, .45]   | .61**<br>[.51, .69]    |                        |
| 11. Urban Population           | 59.07    | 22.57     | -.50**<br>[-.61, -.38] | -.41**<br>[-.53, -.28] | -.42**<br>[-.56, -.25] | .79**<br>[.72, .84]    | .67**<br>[.54, .77]    | .78**<br>[.69, .85]    | .44**<br>[.30, .55]    | -.18*<br>[-.32, -.02] | -.35**<br>[-.47, -.23] | -.69**<br>[-.76, -.61] |

**Table S2.** Means, standard deviations, and correlations with confidence intervals between national religiosity, national economic development, and the national covariates



| Control variable<br>included in model | GWP  |              |               |           |         | IPP  |              |               |           |         | WVS  |              |               |         |         |
|---------------------------------------|------|--------------|---------------|-----------|---------|------|--------------|---------------|-----------|---------|------|--------------|---------------|---------|---------|
|                                       | beta | 95% CI       | %<br>mediated | N         | Nations | beta | 95% CI       | %<br>mediated | N         | Nations | beta | 95% CI       | %<br>mediated | N       | Nations |
| Individualism                         | .022 | [.017, .027] | 45.9%         | 1,374,821 | 136     | .014 | [.009, .020] | 44.1%         | 1,441,228 | 76      | .012 | [.007, .018] | -33.2%        | 246,777 | 82      |
| Income<br>Inequality                  | .012 | [.009, .014] | 23.4%         | 1,415,345 | 136     | .020 | [.015, .024] | 65.0%         | 1,473,708 | 73      | .017 | [.011, .023] | -91.8%        | 254,889 | 81      |
| Pathogen<br>Prevalence                | .015 | [.012, .019] | 44.6%         | 1,554,203 | 154     | .015 | [.010, .020] | 51.2%         | 1,499,736 | 85      | .008 | [.004, .012] | -15.4%        | 273,753 | 91      |
| Employment in<br>Agriculture          | .016 | [.013, .020] | 100.0%        | 1,557,071 | 154     | .013 | [.009, .018] | 72.3%         | 1,497,666 | 83      | .014 | [.008, .020] | -38.9%        | 271,963 | 90      |
| Urban<br>Population                   | .017 | [.014, .021] | 44.3%         | 1,557,071 | 154     | .015 | [.010, .019] | 53.4%         | 1,499,377 | 84      | .014 | [.008, .021] | -88.4%        | 271,963 | 90      |

**Table S3.** Indirect effect of main-text model 4 when including covariates. Presented are estimates for the mediation effect of national religiosity when including various covariates, 95% Confidence Intervals, percentage mediated, final number of participants.

|                            | GWP               |                |                   |                | IPP         |                |             |                |
|----------------------------|-------------------|----------------|-------------------|----------------|-------------|----------------|-------------|----------------|
|                            | Positive Emotions |                | Negative Emotions |                | Anxiety     |                | Depression  |                |
|                            | <i>beta</i>       | 95% CI         | <i>beta</i>       | 95% CI         | <i>beta</i> | 95% CI         | <i>beta</i> | 95% CI         |
| Intercept                  | -.024             | [-.061, .014]  | -.117             | [-.148, -.086] | -.211       | [-.237, -.184] | -.109       | [-.135, -.084] |
| SES                        | .174              | [.164, .183]   | -.204             | [-.214, -.194] | -.072       | [-.079, -.066] | -.043       | [-.049, -.038] |
| Religiosity                | .046              | [-.002, .093]  | .085              | [.046, .125]   | -.008       | [-.040, .024]  | .027        | [-.003, .058]  |
| Log10 GDP per capita       | .103              | [.055, .151]   | .020              | [-.020, .059]  | .014        | [-.018, .046]  | .022        | [-.009, .052]  |
| Age                        | -.109             | [-.110, -.107] | .036              | [.034, .037]   | -.072       | [-.073, -.071] | -.116       | [-.117, -.115] |
| Gender                     | .018              | [.015, .021]   | .085              | [.082, .088]   | .388        | [.386, .390]   | .217        | [.214, .219]   |
| SES x Religiosity          | -.018             | [-.030, -.006] | .008              | [-.005, .020]  | .022        | [.014, .030]   | .014        | [.008, .021]   |
| SES x Log10 GDP per capita | .012              | [-2e-04, .024] | -.034             | [-.047, -.022] | -.005       | [-.013, .004]  | -.012       | [-.020, -.004] |

**Table S4.** Estimates and 95% Confidence Intervals for main text model 3 when using alternative well-being indicators in the GWP and IPP. The WVS did not include any additional indicators of well-being besides the one used in the main text results. The final sample sizes for the models including alternative well-being indicators are reported in Table S5.

| <b>Alternative Well-Being Indicators</b> | <b>beta</b> | <b>95% CI</b>  | <b>% mediated</b> | <b>N</b>  | <b>Nations</b> |
|------------------------------------------|-------------|----------------|-------------------|-----------|----------------|
| GWP: Positive Emotions                   | .009        | [.007, .011]   | 41.8%             | 1,545,102 | 156            |
| GWP: Negative Emotions                   | -.003       | [-.005, -.001] | 9.3%              | 1,526,879 | 156            |
| IPP: Anxiety                             | -.015       | [-.019, -.011] | 100.0%            | 3,169,763 | 116            |
| IPP: Depression                          | -.010       | [-.013, -.007] | 50.8%             | 3,169,576 | 116            |

**Table S5.** Estimates, 95% Confidence Intervals, and percentage mediated for the results of main text model 4 when using alternative well-being indicators in the GWP and IPP. The WVS did not include any additional indicators of well-being besides the one used in the main text results.

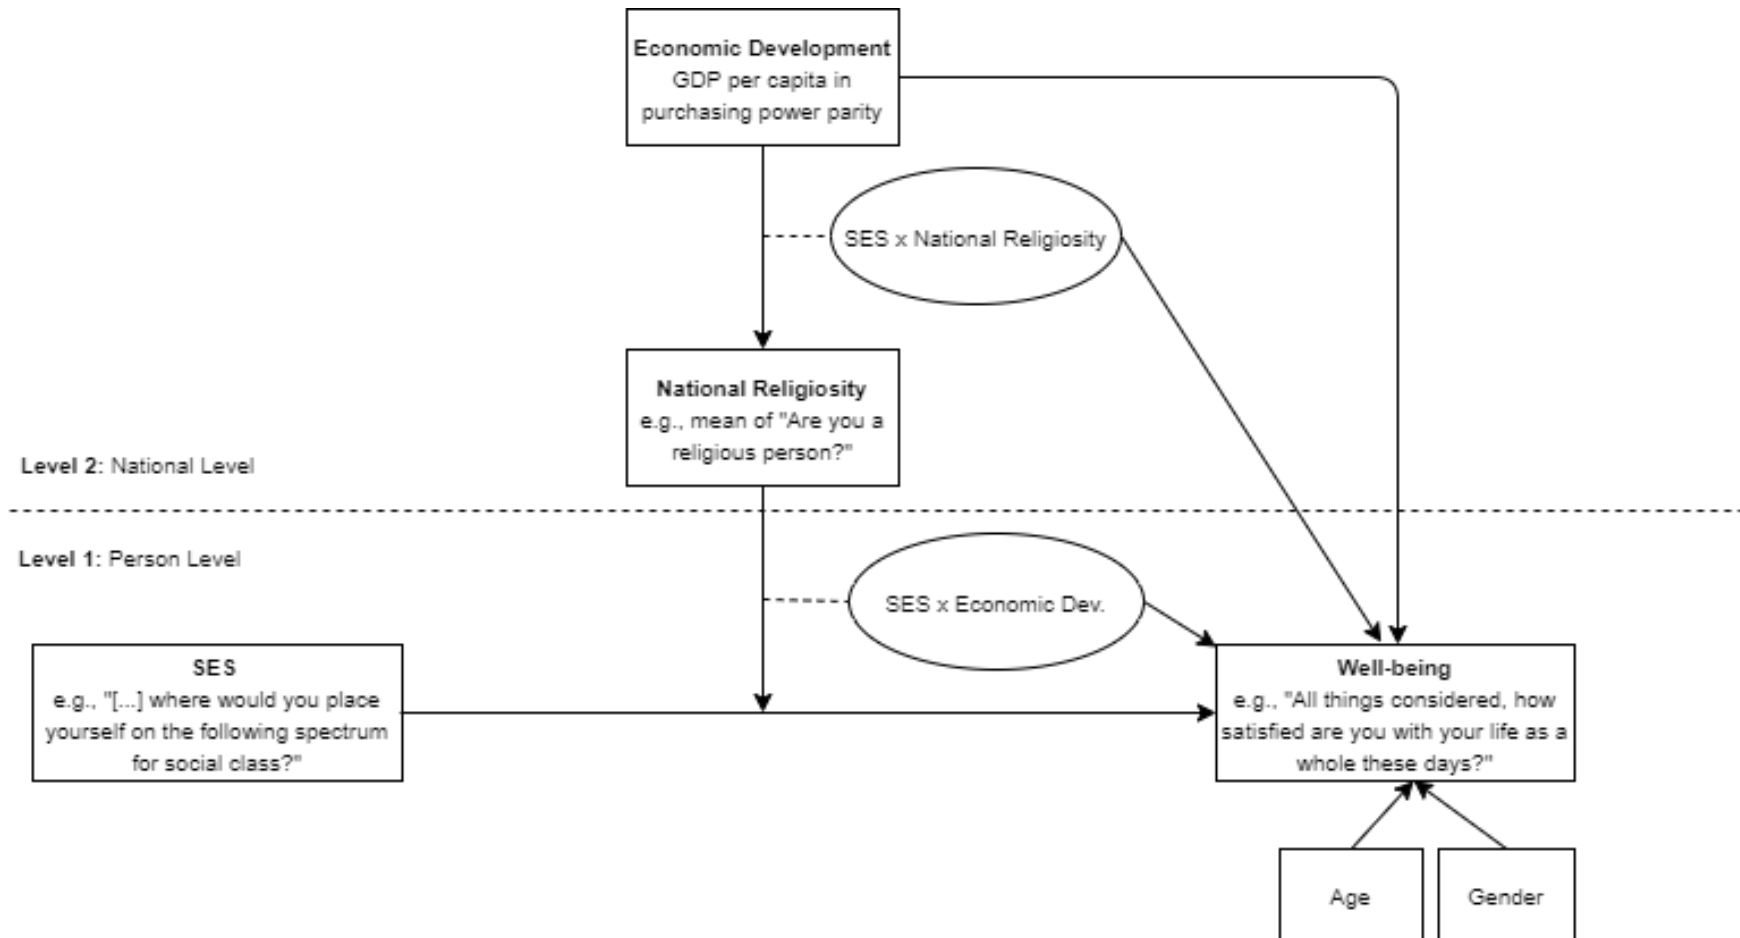

**Figure S1.** Mixed Effects Mediated Moderation Model (model 4). Statistical model to calculate the portion of the cross-level interaction (moderation) effect of economic development that is mediated by national religiosity.

**SI References**

1. T. M. Entringer, *et al.*, Big Five facets and religiosity: Three large-scale, cross-cultural, theory-driven, and process-attentive tests. *J. Pers. Soc. Psychol.* (2020) <https://doi.org/10.1037/pspp0000364>.
2. J. E. Gebauer, *et al.*, The well-being benefits of person-culture match are contingent on basic personality traits. *Psychol. Sci.* **31**, 1283–1293 (2020).
